# Supplementary material for: Synthesis, structure, characterization, and multifunctional properties of a family of rare earth organic frameworks
Source: Royal Society of Chemistry journal article supplement (doi:10.1039/c7ce00202e), 2017-01-01
Supplement: c7ce00202e1.pdf [file c7ce00202e1.pdf]

## Supporting Information

### **Synthesis, structure, characterization and multifunctional properties of a family of rare earth organic frameworks**

**Haoran Li,<sup>a,b</sup> Tianlu Sheng,<sup>a</sup> Zhenzhen Xue,<sup>a,b</sup> Xiaoquan Zhu,<sup>a,b</sup> Shengmin Hu,<sup>a</sup> Yuehong Wen,<sup>a</sup> Ruibiao Fu,<sup>a</sup> Chao Zhuo<sup>a,b</sup> and Xintao Wu<sup>\*a</sup>**

*<sup>a</sup>State Key Laboratory of Structure Chemistry, Fujian Institute of Research on the Structure of Matter, Chinese Academy of Sciences, Fuzhou, 350002, China.*

*<sup>b</sup>University of the Chinese Academy of Sciences, Beijing, 100049, China.*

E-mail: [wxt@fjirsm.ac.cn](mailto:wxt@fjirsm.ac.cn).

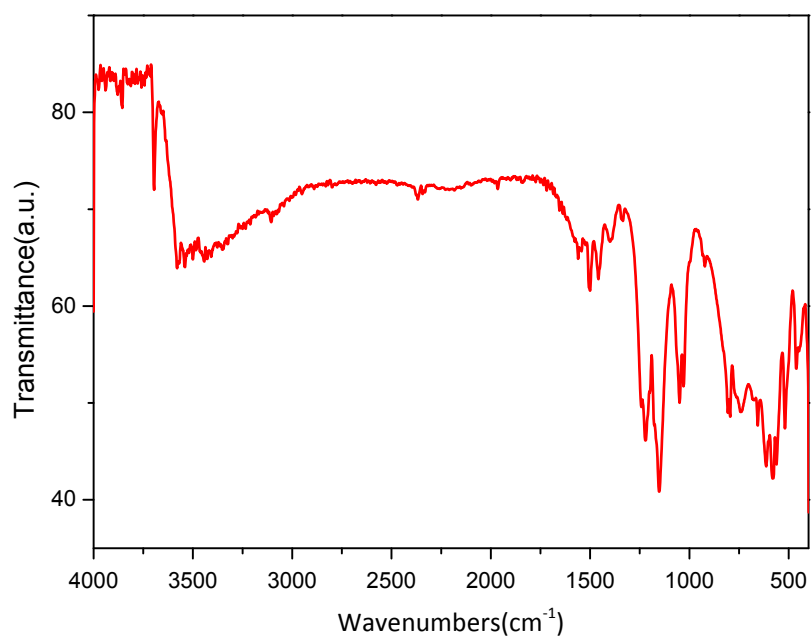

**Fig. S1** IR spectra for compound **1**.

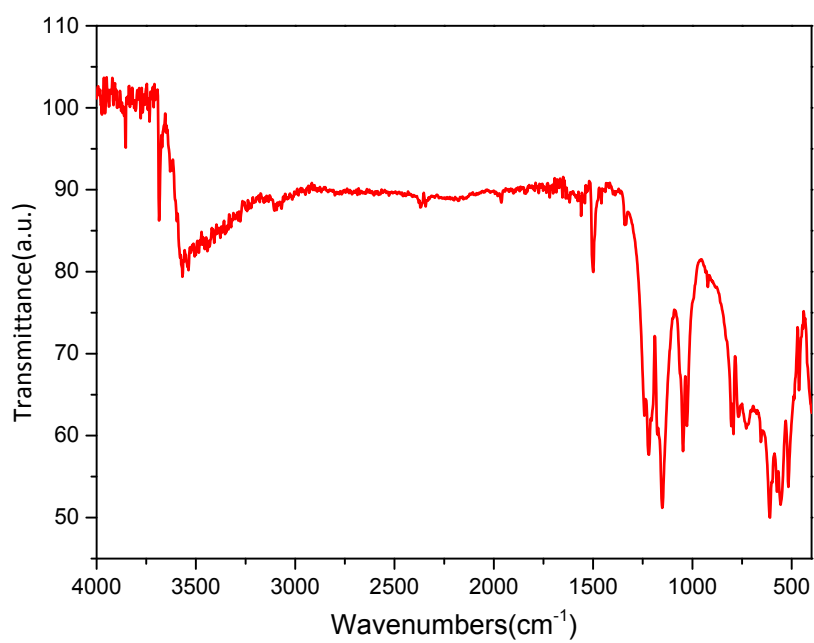

**Fig. S2** IR spectra for compound **2**.

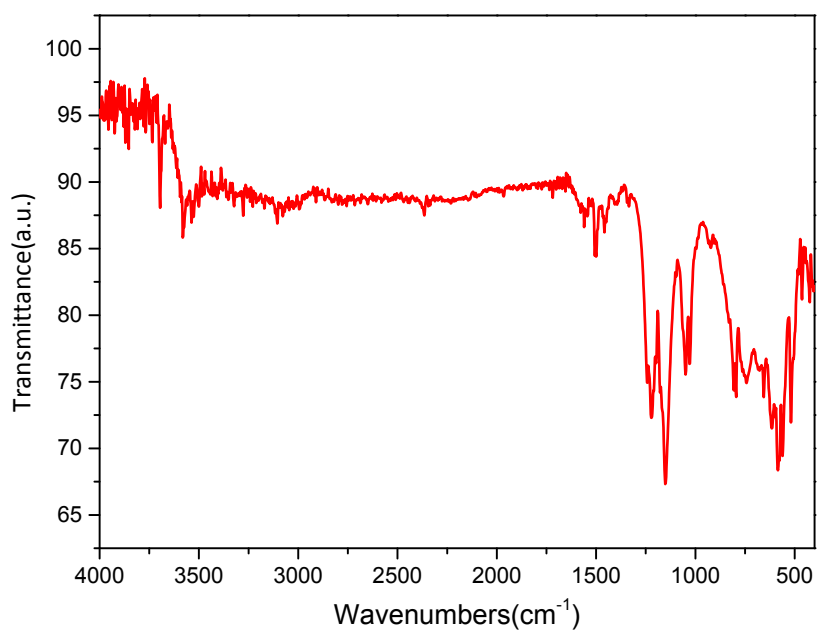

**Fig. S3** IR spectra for compound **3**.

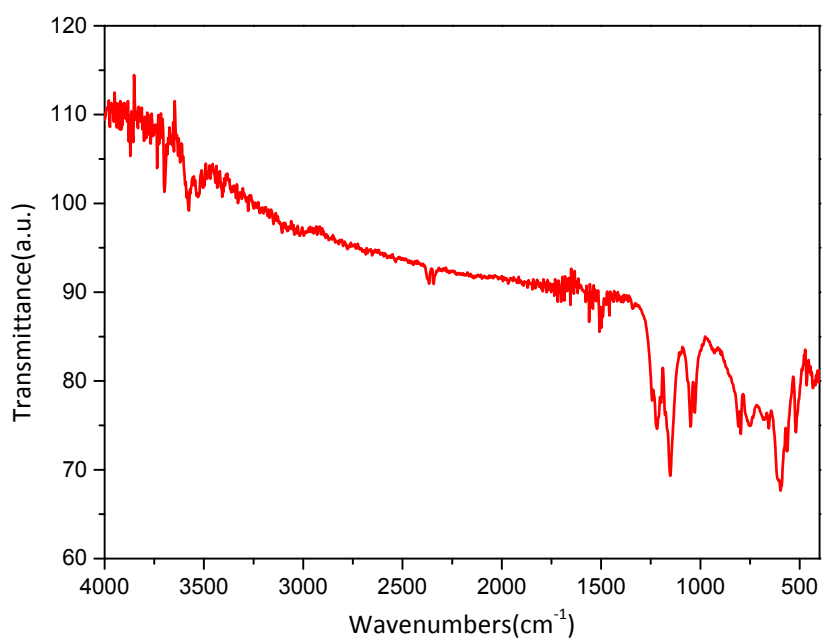

**Fig. S4** IR spectra for compound **4**.

**Table S1** Closest metal-metal distances, selected bond lengths and angles in compound **1**

| Compound 1 <sup>a</sup> |            |                    |            |
|-------------------------|------------|--------------------|------------|
| Y(1)-O(13)              | 2.336(5)   | Y(2)-O(8)#3        | 2.374(6)   |
| Y(1)-O(11)#1            | 2.345(6)   | Y(2)-O(13)         | 2.398(5)   |
| Y(1)-O(1)               | 2.357(6)   | Y(2)-O(4)          | 2.428(7)   |
| Y(1)-O(11)              | 2.362(6)   | Y(2)-Y(3)          | 3.5061(17) |
| Y(1)-O(12)              | 2.370(6)   | Y(2)-Y(1)#4        | 3.8253(18) |
| Y(1)-O(7)               | 2.392(6)   | Y(2)-Y(2)#4        | 3.843(2)   |
| Y(1)-O(10)#1            | 2.402(5)   | Y(3)-O(13)         | 2.331(6)   |
| Y(1)-O(9)#2             | 2.415(6)   | Y(3)-O(9)          | 2.361(6)   |
| Y(1)-Y(3)               | 3.515(2)   | Y(3)-O(10)         | 2.367(6)   |
| Y(1)-Y(2)               | 3.5151(16) | Y(3)-O(12)         | 2.367(6)   |
| Y(1)-Y(3)#2             | 3.721(2)   | Y(3)-O(2)#5        | 2.367(6)   |
| Y(1)-Y(1)#1             | 3.7997(19) | Y(3)-O(11)         | 2.403(6)   |
| Y(2)-O(8)               | 2.301(6)   | Y(3)-O(10)#6       | 2.409(6)   |
| Y(2)-O(9)#3             | 2.315(6)   | Y(3)-O(8)          | 2.464(6)   |
| Y(2)-O(7)               | 2.320(6)   | Y(3)-Y(1)#5        | 3.721(2)   |
| Y(2)-O(12)              | 2.347(6)   | Y(3)-Y(1)#1        | 3.8480(16) |
| Y(2)-O(7)#4             | 2.352(5)   |                    |            |
| O(13)-Y(1)-O(11)#1      | 131.6(2)   | O(7)#4-Y(2)-O(8)#3 | 75.4(2)    |
| O(13)-Y(1)-O(1)         | 73.9(2)    | O(8)-Y(2)-O(13)    | 70.94(19)  |
| O(11)#1-Y(1)-O(1)       | 138.7(2)   | O(9)#3-Y(2)-O(13)  | 151.35(19) |
| O(13)-Y(1)-O(11)        | 71.0(2)    | O(7)-Y(2)-O(13)    | 69.45(19)  |
| O(11)#1-Y(1)-O(11)      | 72.4(2)    | O(12)-Y(2)-O(13)   | 60.98(19)  |
| O(1)-Y(1)-O(11)         | 93.3(2)    | O(7)#4-Y(2)-O(13)  | 129.68(18) |
| O(13)-Y(1)-O(12)        | 61.56(19)  | O(8)#3-Y(2)-O(13)  | 129.0(2)   |
| O(11)#1-Y(1)-O(12)      | 80.99(19)  | O(8)-Y(2)-O(4)     | 89.9(2)    |
| O(1)-Y(1)-O(12)         | 135.02(19) | O(9)#3-Y(2)-O(4)   | 77.8(2)    |
| O(11)-Y(1)-O(12)        | 78.4(2)    | O(7)-Y(2)-O(4)     | 79.3(2)    |
| O(13)-Y(1)-O(7)         | 69.30(19)  | O(12)-Y(2)-O(4)    | 134.4(2)   |
| O(11)#1-Y(1)-O(7)       | 133.82(19) | O(7)#4-Y(2)-O(4)   | 124.1(2)   |
| O(1)-Y(1)-O(7)          | 81.6(2)    | O(8)#3-Y(2)-O(4)   | 134.2(2)   |
| O(11)-Y(1)-O(7)         | 139.85(19) | O(13)-Y(2)-O(4)    | 73.9(2)    |
| O(12)-Y(1)-O(7)         | 77.7(2)    | O(13)-Y(3)-O(9)    | 135.79(19) |
| O(13)-Y(1)-O(10)#1      | 142.56(19) | O(13)-Y(3)-O(10)   | 131.90(19) |
| O(11)#1-Y(1)-O(10)#1    | 72.2(2)    | O(9)-Y(3)-O(10)    | 76.15(19)  |
| O(1)-Y(1)-O(10)#1       | 71.50(19)  | O(13)-Y(3)-O(12)   | 61.7(2)    |
| O(11)-Y(1)-O(10)#1      | 97.11(19)  | O(9)-Y(3)-O(12)    | 98.3(2)    |
| O(12)-Y(1)-O(10)#1      | 152.88(19) | O(10)-Y(3)-O(12)   | 82.08(19)  |
| O(7)-Y(1)-O(10)#1       | 118.28(19) | O(13)-Y(3)-O(2)#5  | 73.7(2)    |
| O(13)-Y(1)-O(9)#2       | 137.17(19) | O(9)-Y(3)-O(2)#5   | 106.7(2)   |
| O(11)#1-Y(1)-O(9)#2     | 75.4(2)    | O(10)-Y(3)-O(2)#5  | 140.7(2)   |
| O(1)-Y(1)-O(9)#2        | 108.7(2)   | O(12)-Y(3)-O(2)#5  | 134.0(2)   |

|                     |            |                     |            |
|---------------------|------------|---------------------|------------|
| O(11)-Y(1)-O(9)#2   | 147.5(2)   | O(13)-Y(3)-O(11)    | 70.4(2)    |
| O(12)-Y(1)-O(9)#2   | 100.38(19) | O(9)-Y(3)-O(11)     | 148.0(2)   |
| O(7)-Y(1)-O(9)#2    | 68.93(19)  | O(10)-Y(3)-O(11)    | 71.8(2)    |
| O(10)#1-Y(1)-O(9)#2 | 69.12(18)  | O(12)-Y(3)-O(11)    | 77.64(19)  |
| O(8)-Y(2)-O(9)#3    | 104.90(19) | O(2)#5-Y(3)-O(11)   | 98.0(2)    |
| O(8)-Y(2)-O(7)      | 140.4(2)   | O(13)-Y(3)-O(10)#6  | 143.16(19) |
| O(9)#3-Y(2)-O(7)    | 109.7(2)   | O(9)-Y(3)-O(10)#6   | 69.89(19)  |
| O(8)-Y(2)-O(12)     | 81.49(19)  | O(10)-Y(3)-O(10)#6  | 71.5(2)    |
| O(9)#3-Y(2)-O(12)   | 147.61(19) | O(12)-Y(3)-O(10)#6  | 152.9(2)   |
| O(7)-Y(2)-O(12)     | 79.6(2)    | O(2)#5-Y(3)-O(10)#6 | 73.0(2)    |
| O(8)-Y(2)-O(7)#4    | 142.3(2)   | O(11)-Y(3)-O(10)#6  | 99.26(19)  |
| O(9)#3-Y(2)-O(7)#4  | 71.31(19)  | O(13)-Y(3)-O(8)     | 69.28(19)  |
| O(7)-Y(2)-O(7)#4    | 69.3(2)    | O(9)-Y(3)-O(8)      | 68.0(2)    |
| O(12)-Y(2)-O(7)#4   | 84.24(19)  | O(10)-Y(3)-O(8)     | 135.31(19) |
| O(8)-Y(2)-O(8)#3    | 68.4(2)    | O(12)-Y(3)-O(8)     | 77.77(18)  |
| O(9)#3-Y(2)-O(8)#3  | 70.3(2)    | O(2)#5-Y(3)-O(8)    | 76.9(2)    |
| O(7)-Y(2)-O(8)#3    | 141.99(19) | O(11)-Y(3)-O(8)     | 139.1(2)   |
| O(12)-Y(2)-O(8)#3   | 83.4(2)    | O(10)#6-Y(3)-O(8)   | 117.06(18) |

<sup>a</sup>Symmetry codes: (#1) -x-2,-y+2,-z+1; (#2) -x-3,-y+2,-z+1; (#3) -x-2,-y+1,-z+1; (#4) x+1,y,z; (#5) x-1,y,z; (#6) -x-3,-y+1,-z+1; (#7) -x-3,-y+2,-z+2; (#8) -x-2,-y+1,-z+2

**Table S2** Closest metal-metal distances, selected bond lengths and angles in compound **2**

| Compound 2 <sup>b</sup> |          |                    |          |
|-------------------------|----------|--------------------|----------|
| Gd(1)-O(11)#1           | 2.356(7) | Gd(2)-O(12)        | 2.410(7) |
| Gd(1)-O(11)             | 2.356(8) | Gd(2)-O(8)#3       | 2.429(7) |
| Gd(1)-O(12)             | 2.391(7) | Gd(2)-O(4)         | 2.453(8) |
| Gd(1)-O(13)             | 2.414(7) | Gd(2)-Gd(3)        | 3.580(3) |
| Gd(1)-O(1)              | 2.416(7) | Gd(2)-Gd(1)#4      | 3.900(3) |
| Gd(1)-O(9)#2            | 2.434(7) | Gd(2)-Gd(3)#3      | 3.936(3) |
| Gd(1)-O(7)              | 2.454(8) | Gd(3)-O(12)        | 2.367(9) |
| Gd(1)-O(10)#1           | 2.453(7) | Gd(3)-O(13)        | 2.388(7) |
| Gd(1)-Gd(2)             | 3.583(3) | Gd(3)-O(9)         | 2.390(7) |
| Gd(1)-Gd(3)             | 3.594(3) | Gd(3)-O(10)        | 2.393(7) |
| Gd(1)-Gd(3)#2           | 3.779(3) | Gd(3)-O(2)#5       | 2.419(7) |
| Gd(1)-Gd(1)#1           | 3.878(3) | Gd(3)-O(10)#6      | 2.451(8) |
| Gd(2)-O(7)              | 2.331(8) | Gd(3)-O(8)         | 2.472(8) |
| Gd(2)-O(8)              | 2.364(8) | Gd(3)-O(11)        | 2.494(7) |
| Gd(2)-O(9)#3            | 2.368(7) | Gd(3)-Gd(1)#5      | 3.779(3) |
| Gd(2)-O(13)             | 2.380(7) | Gd(3)-Gd(1)#1      | 3.916(3) |
| Gd(2)-O(7)#4            | 2.396(7) |                    |          |
| O(11)#1-Gd(1)-O(11)     | 69.2(3)  | O(7)#4-Gd(2)-O(12) | 128.4(2) |
| O(11)#1-Gd(1)-O(12)     | 129.3(3) | O(7)-Gd(2)-O(8)#3  | 140.2(2) |

|                       |          |                      |          |
|-----------------------|----------|----------------------|----------|
| O(11)-Gd(1)-O(12)     | 72.7(3)  | O(8)-Gd(2)-O(8)#3    | 69.5(3)  |
| O(11)#1-Gd(1)-O(13)   | 80.3(2)  | O(9)#3-Gd(2)-O(8)#3  | 69.2(3)  |
| O(11)-Gd(1)-O(13)     | 77.9(2)  | O(13)-Gd(2)-O(8)#3   | 83.9(2)  |
| O(12)-Gd(1)-O(13)     | 59.8(2)  | O(7)#4-Gd(2)-O(8)#3  | 75.5(3)  |
| O(11)#1-Gd(1)-O(1)    | 139.2(2) | O(12)-Gd(2)-O(8)#3   | 129.2(3) |
| O(11)-Gd(1)-O(1)      | 95.6(2)  | O(7)-Gd(2)-O(4)      | 81.3(3)  |
| O(12)-Gd(1)-O(1)      | 75.7(2)  | O(8)-Gd(2)-O(4)      | 90.1(3)  |
| O(13)-Gd(1)-O(1)      | 135.1(2) | O(9)#3-Gd(2)-O(4)    | 77.8(2)  |
| O(11)#1-Gd(1)-O(9)#2  | 76.9(3)  | O(13)-Gd(2)-O(4)     | 135.1(2) |
| O(11)-Gd(1)-O(9)#2    | 145.7(2) | O(7)#4-Gd(2)-O(4)    | 124.1(3) |
| O(12)-Gd(1)-O(9)#2    | 137.2(3) | O(12)-Gd(2)-O(4)     | 75.3(3)  |
| O(13)-Gd(1)-O(9)#2    | 101.7(2) | O(8)#3-Gd(2)-O(4)    | 133.1(2) |
| O(1)-Gd(1)-O(9)#2     | 107.1(3) | O(12)-Gd(3)-O(13)    | 60.5(2)  |
| O(11)#1-Gd(1)-O(7)    | 133.5(2) | O(12)-Gd(3)-O(9)     | 135.5(3) |
| O(11)-Gd(1)-O(7)      | 141.0(2) | O(13)-Gd(3)-O(9)     | 99.1(2)  |
| O(12)-Gd(1)-O(7)      | 69.0(3)  | O(12)-Gd(3)-O(10)    | 131.9(2) |
| O(13)-Gd(1)-O(7)      | 76.7(3)  | O(13)-Gd(3)-O(10)    | 82.2(2)  |
| O(1)-Gd(1)-O(7)       | 82.2(2)  | O(9)-Gd(3)-O(10)     | 75.6(2)  |
| O(9)#2-Gd(1)-O(7)     | 69.1(2)  | O(12)-Gd(3)-O(2)#5   | 74.4(3)  |
| O(11)#1-Gd(1)-O(10)#1 | 72.9(2)  | O(13)-Gd(3)-O(2)#5   | 133.7(3) |
| O(11)-Gd(1)-O(10)#1   | 96.1(3)  | O(9)-Gd(3)-O(2)#5    | 106.2(2) |
| O(12)-Gd(1)-O(10)#1   | 144.0(2) | O(10)-Gd(3)-O(2)#5   | 141.1(3) |
| O(13)-Gd(1)-O(10)#1   | 152.9(2) | O(12)-Gd(3)-O(10)#6  | 144.5(2) |
| O(1)-Gd(1)-O(10)#1    | 71.4(2)  | O(13)-Gd(3)-O(10)#6  | 152.7(2) |
| O(9)#2-Gd(1)-O(10)#1  | 68.5(2)  | O(9)-Gd(3)-O(10)#6   | 69.2(2)  |
| O(7)-Gd(1)-O(10)#1    | 119.5(3) | O(10)-Gd(3)-O(10)#6  | 71.1(2)  |
| O(7)-Gd(2)-O(8)       | 140.7(3) | O(2)#5-Gd(3)-O(10)#6 | 73.5(3)  |
| O(7)-Gd(2)-O(9)#3     | 108.8(3) | O(12)-Gd(3)-O(8)     | 68.8(3)  |
| O(8)-Gd(2)-O(9)#3     | 106.6(2) | O(13)-Gd(3)-O(8)     | 77.6(2)  |
| O(7)-Gd(2)-O(13)      | 79.7(3)  | O(9)-Gd(3)-O(8)      | 68.2(3)  |
| O(8)-Gd(2)-O(13)      | 79.9(2)  | O(10)-Gd(3)-O(8)     | 134.5(2) |
| O(9)#3-Gd(2)-O(13)    | 147.1(2) | O(2)#5-Gd(3)-O(8)    | 77.0(2)  |
| O(7)-Gd(2)-O(7)#4     | 67.0(3)  | O(10)#6-Gd(3)-O(8)   | 117.4(2) |
| O(8)-Gd(2)-O(7)#4     | 142.7(3) | O(12)-Gd(3)-O(11)    | 70.7(3)  |
| O(9)#3-Gd(2)-O(7)#4   | 71.2(2)  | O(13)-Gd(3)-O(11)    | 75.8(2)  |
| O(13)-Gd(2)-O(7)#4    | 84.2(2)  | O(9)-Gd(3)-O(11)     | 147.1(2) |
| O(7)-Gd(2)-O(12)      | 70.8(3)  | O(10)-Gd(3)-O(11)    | 71.6(2)  |
| O(8)-Gd(2)-O(12)      | 69.9(3)  | O(2)#5-Gd(3)-O(11)   | 99.9(2)  |
| O(9)#3-Gd(2)-O(12)    | 152.9(2) | O(10)#6-Gd(3)-O(11)  | 100.3(2) |
| O(13)-Gd(2)-O(12)     | 60.0(2)  | O(8)-Gd(3)-O(11)     | 138.7(3) |

<sup>b</sup>Symmetry codes: (#1) -x+1,-y,-z; (#2) x+1,y,z; (#3) -x,-y+1,-z; (#4) -x+1,-y+1,-z; (#5) x-1,y,z; (#6) -x,-y,-z; (#7) -x+1,-y,-z+1; (#8) -x,-y+1,-z+1

**Table S3** Closest metal-metal distances, selected bond lengths and angles in compound **3**

| <b>Compound 3<sup>c</sup></b> |            |                      |           |
|-------------------------------|------------|----------------------|-----------|
| Er(1)-O(13A)                  | 1.999(16)  | Er(2)-O(9)#1         | 2.340(6)  |
| Er(1)-O(10A)#1                | 2.000(15)  | Er(2)-O(9)           | 2.344(7)  |
| Er(1)-O(13A)#2                | 2.203(15)  | Er(2)-O(7)           | 2.356(6)  |
| Er(1)-O(13)                   | 2.281(12)  | Er(2)-O(11)#3        | 2.364(7)  |
| Er(1)-O(7)                    | 2.314(6)   | Er(2)-O(4)           | 2.399(7)  |
| Er(1)-O(9)                    | 2.360(7)   | Er(2)-O(8A)          | 2.71(2)   |
| Er(1)-O(13)#2                 | 2.355(12)  | Er(2)-Er(3)          | 3.4872(8) |
| Er(1)-O(8)                    | 2.371(19)  | Er(3)-O(8A)          | 1.969(18) |
| Er(1)-O(1)                    | 2.393(7)   | Er(3)-O(7)           | 2.319(8)  |
| Er(1)-O(10)#1                 | 2.402(11)  | Er(3)-O(12)          | 2.328(7)  |
| Er(1)-O(12)#2                 | 2.408(6)   | Er(3)-O(10)#3        | 2.358(11) |
| Er(1)-Er(2)                   | 3.5057(12) | Er(3)-O(12)#4        | 2.354(7)  |
| Er(2)-O(8B)                   | 1.92(2)    | Er(3)-O(8)           | 2.353(18) |
| Er(2)-O(10A)                  | 2.254(17)  | Er(3)-O(2)#5         | 2.363(7)  |
| Er(2)-O(10)                   | 2.316(11)  | Er(3)-O(13)#2        | 2.381(11) |
| Er(2)-O(11)                   | 2.316(7)   | Er(3)-O(11)          | 2.438(6)  |
| Er(2)-O(8)                    | 2.343(19)  | Er(3)-O(8B)          | 2.609(19) |
| O(13A)-Er(1)-O(10A)#1         | 78.3(6)    | O(10)-Er(2)-O(7)     | 151.8(3)  |
| O(13A)-Er(1)-O(13A)#2         | 51.4(7)    | O(11)-Er(2)-O(7)     | 71.1(2)   |
| O(10A)#1-Er(1)-O(13A)#2       | 129.5(6)   | O(8)-Er(2)-O(7)      | 60.5(5)   |
| O(13A)-Er(1)-O(13)            | 15.6(5)    | O(9)#1-Er(2)-O(7)    | 129.7(2)  |
| O(10A)#1-Er(1)-O(13)          | 74.2(5)    | O(9)-Er(2)-O(7)      | 69.0(2)   |
| O(13A)#2-Er(1)-O(13)          | 58.8(5)    | O(8B)-Er(2)-O(11)#3  | 56.8(6)   |
| O(13A)-Er(1)-O(7)             | 116.1(5)   | O(10A)-Er(2)-O(11)#3 | 95.2(4)   |
| O(10A)#1-Er(1)-O(7)           | 114.1(4)   | O(10)-Er(2)-O(11)#3  | 70.2(3)   |
| O(13A)#2-Er(1)-O(7)           | 87.4(4)    | O(11)-Er(2)-O(11)#3  | 69.2(3)   |
| O(13)-Er(1)-O(7)              | 131.6(4)   | O(8)-Er(2)-O(11)#3   | 83.4(5)   |
| O(13A)-Er(1)-O(9)             | 134.9(4)   | O(9)#1-Er(2)-O(11)#3 | 74.1(2)   |
| O(10A)#1-Er(1)-O(9)           | 61.0(5)    | O(9)-Er(2)-O(11)#3   | 141.1(2)  |
| O(13A)#2-Er(1)-O(9)           | 156.3(4)   | O(7)-Er(2)-O(11)#3   | 129.4(3)  |
| O(13)-Er(1)-O(9)              | 135.0(3)   | O(8B)-Er(2)-O(4)     | 152.9(6)  |
| O(7)-Er(1)-O(9)               | 69.4(2)    | O(10A)-Er(2)-O(4)    | 70.3(4)   |
| O(13A)-Er(1)-O(13)#2          | 60.1(5)    | O(10)-Er(2)-O(4)     | 77.5(3)   |
| O(10A)#1-Er(1)-O(13)#2        | 133.4(6)   | O(11)-Er(2)-O(4)     | 90.6(2)   |
| O(13A)#2-Er(1)-O(13)#2        | 15.8(4)    | O(8)-Er(2)-O(4)      | 134.6(5)  |
| O(13)-Er(1)-O(13)#2           | 70.5(4)    | O(9)#1-Er(2)-O(4)    | 123.7(3)  |
| O(7)-Er(1)-O(13)#2            | 71.8(3)    | O(9)-Er(2)-O(4)      | 79.3(2)   |
| O(9)-Er(1)-O(13)#2            | 140.5(3)   | O(7)-Er(2)-O(4)      | 74.6(2)   |
| O(13A)-Er(1)-O(8)             | 69.2(6)    | O(11)#3-Er(2)-O(4)   | 134.8(2)  |
| O(10A)#1-Er(1)-O(8)           | 68.9(6)    | O(8B)-Er(2)-O(8A)    | 13.6(7)   |
| O(13A)#2-Er(1)-O(8)           | 86.4(6)    | O(10A)-Er(2)-O(8A)   | 150.2(5)  |

|                        |          |                       |          |
|------------------------|----------|-----------------------|----------|
| O(13)-Er(1)-O(8)       | 82.1(5)  | O(10)-Er(2)-O(8A)     | 133.2(5) |
| O(7)-Er(1)-O(8)        | 60.7(5)  | O(11)-Er(2)-O(8A)     | 59.4(4)  |
| O(9)-Er(1)-O(8)        | 78.3(5)  | O(8)-Er(2)-O(8A)      | 26.5(6)  |
| O(13)#2-Er(1)-O(8)     | 76.9(5)  | O(9)#1-Er(2)-O(8A)    | 94.6(4)  |
| O(13A)-Er(1)-O(1)      | 143.1(4) | O(9)-Er(2)-O(8A)      | 105.6(4) |
| O(10A)#1-Er(1)-O(1)    | 131.8(5) | O(7)-Er(2)-O(8A)      | 70.3(4)  |
| O(13A)#2-Er(1)-O(1)    | 97.0(4)  | O(11)#3-Er(2)-O(8A)   | 63.0(4)  |
| O(13)-Er(1)-O(1)       | 137.0(3) | O(4)-Er(2)-O(8A)      | 139.5(4) |
| O(7)-Er(1)-O(1)        | 74.8(2)  | O(8A)-Er(3)-O(7)      | 85.9(7)  |
| O(9)-Er(1)-O(1)        | 81.8(2)  | O(8A)-Er(3)-O(12)     | 75.4(6)  |
| O(13)#2-Er(1)-O(1)     | 94.8(3)  | O(7)-Er(3)-O(12)      | 132.1(2) |
| O(8)-Er(1)-O(1)        | 135.2(5) | O(8A)-Er(3)-O(10)#3   | 67.4(7)  |
| O(13A)-Er(1)-O(10)#1   | 86.7(5)  | O(7)-Er(3)-O(10)#3    | 136.0(3) |
| O(10A)#1-Er(1)-O(10)#1 | 31.6(5)  | O(12)-Er(3)-O(10)#3   | 75.7(3)  |
| O(13A)#2-Er(1)-O(10)#1 | 132.3(5) | O(8A)-Er(3)-O(12)#4   | 129.1(7) |
| O(13)-Er(1)-O(10)#1    | 75.3(4)  | O(7)-Er(3)-O(12)#4    | 145.0(2) |
| O(7)-Er(1)-O(10)#1     | 137.1(3) | O(12)-Er(3)-O(12)#4   | 69.0(3)  |
| O(9)-Er(1)-O(10)#1     | 69.1(3)  | O(10)#3-Er(3)-O(12)#4 | 69.2(3)  |
| O(13)#2-Er(1)-O(10)#1  | 145.7(4) | O(8A)-Er(3)-O(8)      | 31.0(8)  |
| O(8)-Er(1)-O(10)#1     | 100.4(5) | O(7)-Er(3)-O(8)       | 60.9(5)  |
| O(1)-Er(1)-O(10)#1     | 109.3(3) | O(12)-Er(3)-O(8)      | 83.4(5)  |
| O(13A)-Er(1)-O(12)#2   | 84.5(4)  | O(10)#3-Er(3)-O(8)    | 98.3(5)  |
| O(10A)#1-Er(1)-O(12)#2 | 97.2(5)  | O(12)#4-Er(3)-O(8)    | 151.6(5) |
| O(13A)#2-Er(1)-O(12)#2 | 84.4(4)  | O(8A)-Er(3)-O(2)#5    | 144.8(6) |
| O(13)-Er(1)-O(12)#2    | 70.6(3)  | O(7)-Er(3)-O(2)#5     | 74.8(2)  |
| O(7)-Er(1)-O(12)#2     | 144.8(2) | O(12)-Er(3)-O(2)#5    | 138.7(2) |
| O(9)-Er(1)-O(12)#2     | 117.2(2) | O(10)#3-Er(3)-O(2)#5  | 107.2(3) |
| O(13)#2-Er(1)-O(12)#2  | 98.6(3)  | O(12)#4-Er(3)-O(2)#5  | 73.7(3)  |
| O(8)-Er(1)-O(12)#2     | 152.0(5) | O(8)-Er(3)-O(2)#5     | 134.5(6) |
| O(1)-Er(1)-O(12)#2     | 72.3(2)  | O(8A)-Er(3)-O(13)#2   | 102.0(6) |
| O(10)#1-Er(1)-O(12)#2  | 67.7(3)  | O(7)-Er(3)-O(13)#2    | 71.2(3)  |
| O(8B)-Er(2)-O(10A)     | 136.9(7) | O(12)-Er(3)-O(13)#2   | 70.3(4)  |
| O(8B)-Er(2)-O(10)      | 125.1(6) | O(10)#3-Er(3)-O(13)#2 | 146.0(4) |
| O(10A)-Er(2)-O(10)     | 32.0(5)  | O(12)#4-Er(3)-O(13)#2 | 99.1(3)  |
| O(8B)-Er(2)-O(11)      | 70.1(6)  | O(8)-Er(3)-O(13)#2    | 76.7(5)  |
| O(10A)-Er(2)-O(11)     | 134.6(4) | O(2)#5-Er(3)-O(13)#2  | 99.3(3)  |
| O(10)-Er(2)-O(11)      | 105.2(3) | O(8A)-Er(3)-O(11)     | 68.6(6)  |
| O(8B)-Er(2)-O(8)       | 26.8(7)  | O(7)-Er(3)-O(11)      | 69.6(2)  |
| O(10A)-Er(2)-O(8)      | 141.1(6) | O(12)-Er(3)-O(11)     | 136.4(2) |
| O(10)-Er(2)-O(8)       | 147.7(5) | O(10)#3-Er(3)-O(11)   | 68.2(3)  |
| O(11)-Er(2)-O(8)       | 81.2(5)  | O(12)#4-Er(3)-O(11)   | 117.0(2) |
| O(8B)-Er(2)-O(9)#1     | 81.3(6)  | O(8)-Er(3)-O(11)      | 78.5(4)  |
| O(10A)-Er(2)-O(9)#1    | 58.2(4)  | O(2)#5-Er(3)-O(11)    | 77.1(2)  |
| O(10)-Er(2)-O(9)#1     | 70.9(3)  | O(13)#2-Er(3)-O(11)   | 140.2(4) |



|                    |          |                     |          |
|--------------------|----------|---------------------|----------|
| O(11)-Er(2)-O(9)#1 | 141.7(3) | O(8A)-Er(3)-O(8B)   | 18.2(8)  |
| O(8)-Er(2)-O(9)#1  | 84.5(5)  | O(7)-Er(3)-O(8B)    | 68.8(5)  |
| O(8B)-Er(2)-O(9)   | 102.9(6) | O(12)-Er(3)-O(8B)   | 91.9(5)  |
| O(10A)-Er(2)-O(9)  | 78.0(4)  | O(10)#3-Er(3)-O(8B) | 78.6(5)  |
| O(10)-Er(2)-O(9)   | 109.9(3) | O(12)#4-Er(3)-O(8B) | 145.6(5) |
| O(11)-Er(2)-O(9)   | 140.1(2) | O(8)-Er(3)-O(8B)    | 24.2(6)  |
| O(8)-Er(2)-O(9)    | 79.2(5)  | O(2)#5-Er(3)-O(8B)  | 129.3(5) |
| O(9)#1-Er(2)-O(9)  | 69.9(3)  | O(13)#2-Er(3)-O(8B) | 100.9(5) |
| O(8B)-Er(2)-O(7)   | 81.0(6)  | O(11)-Er(3)-O(8B)   | 58.0(4)  |
| O(10A)-Er(2)-O(7)  | 135.3(4) |                     |          |

<sup>c</sup>Symmetry codes: (#1) -x,-y,-z+1; (#2) -x,-y+1,-z+1; (#3) -x+1,-y,-z+1; (#4) -x+1,-y+1,-z+1; (#5) x+1,y,z; (#6) x-1,y,z; (#7) -x,-y+1,-z; (#8) -x+1,-y,-z

**Table S4** Closest metal-metal distances, selected bond lengths and angles in compound **4**

| Compound <b>4</b> <sup>d</sup> |            |                     |            |
|--------------------------------|------------|---------------------|------------|
| Yb(1)-O(10)                    | 2.272(8)   | Yb(2)-O(9)#4        | 2.371(8)   |
| Yb(1)-O(11)                    | 2.280(8)   | Yb(2)-O(11)         | 2.369(8)   |
| Yb(1)-O(11)#1                  | 2.287(8)   | Yb(2)-O(8)#3        | 2.389(8)   |
| Yb(1)-O(9)#2                   | 2.298(8)   | Yb(2)-S(2)          | 3.451(4)   |
| Yb(1)-O(10)#2                  | 2.316(8)   | Yb(2)-Yb(3)         | 3.459(2)   |
| Yb(1)-O(12)                    | 2.339(8)   | Yb(2)-Yb(3)#4       | 3.671(2)   |
| Yb(1)-O(13)                    | 2.367(8)   | Yb(3)-O(13)         | 2.277(8)   |
| Yb(1)-O(1)                     | 2.408(9)   | Yb(3)-O(8)          | 2.310(8)   |
| Yb(1)-Yb(3)                    | 3.4408(19) | Yb(3)-O(9)          | 2.324(8)   |
| Yb(1)-Yb(2)                    | 3.4643(17) | Yb(3)-O(12)         | 2.335(8)   |
| Yb(1)-Yb(2)#1                  | 3.771(2)   | Yb(3)-O(6)#5        | 2.345(9)   |
| Yb(1)-Yb(1)#1                  | 3.780(2)   | Yb(3)-O(8)#6        | 2.384(8)   |
| Yb(2)-O(7)#3                   | 2.275(8)   | Yb(3)-O(7)          | 2.417(8)   |
| Yb(2)-O(13)                    | 2.299(8)   | Yb(3)-O(10)         | 2.441(8)   |
| Yb(2)-O(7)                     | 2.316(8)   | Yb(3)-Yb(2)#5       | 3.671(2)   |
| Yb(2)-O(12)                    | 2.354(8)   | Yb(3)-Yb(2)#3       | 3.8031(17) |
| Yb(2)-O(4)                     | 2.365(9)   |                     |            |
| O(10)-Yb(1)-O(11)              | 141.6(3)   | O(4)-Yb(2)-O(9)#4   | 109.2(3)   |
| O(10)-Yb(1)-O(11)#1            | 142.5(3)   | O(7)#3-Yb(2)-O(11)  | 133.7(3)   |
| O(11)-Yb(1)-O(11)#1            | 68.3(3)    | O(13)-Yb(2)-O(11)   | 69.8(3)    |
| O(10)-Yb(1)-O(9)#2             | 104.2(3)   | O(7)-Yb(2)-O(11)    | 141.1(3)   |
| O(11)-Yb(1)-O(9)#2             | 109.3(3)   | O(12)-Yb(2)-O(11)   | 77.8(3)    |
| O(11)#1-Yb(1)-O(9)#2           | 71.3(3)    | O(4)-Yb(2)-O(11)    | 83.1(3)    |
| O(10)-Yb(1)-O(10)#2            | 67.9(3)    | O(9)#4-Yb(2)-O(11)  | 68.7(3)    |
| O(11)-Yb(1)-O(10)#2            | 141.7(3)   | O(7)#3-Yb(2)-O(8)#3 | 72.4(3)    |
| O(11)#1-Yb(1)-O(10)#2          | 75.9(3)    | O(13)-Yb(2)-O(8)#3  | 142.7(3)   |
| O(9)#2-Yb(1)-O(10)#2           | 70.0(3)    | O(7)-Yb(2)-O(8)#3   | 95.7(3)    |
| O(10)-Yb(1)-O(12)              | 82.0(3)    | O(12)-Yb(2)-O(8)#3  | 151.8(3)   |

|                     |          |                     |          |
|---------------------|----------|---------------------|----------|
| O(11)-Yb(1)-O(12)   | 79.9(3)  | O(4)-Yb(2)-O(8)#3   | 71.4(3)  |
| O(11)#1-Yb(1)-O(12) | 84.1(3)  | O(9)#4-Yb(2)-O(8)#3 | 69.1(3)  |
| O(9)#2-Yb(1)-O(12)  | 147.1(3) | O(11)-Yb(2)-O(8)#3  | 118.8(3) |
| O(10)#2-Yb(1)-O(12) | 83.3(3)  | O(13)-Yb(3)-O(8)    | 131.9(3) |
| O(10)-Yb(1)-O(13)   | 71.5(3)  | O(13)-Yb(3)-O(9)    | 136.2(3) |
| O(11)-Yb(1)-O(13)   | 70.1(3)  | O(8)-Yb(3)-O(9)     | 76.6(3)  |
| O(11)#1-Yb(1)-O(13) | 129.5(3) | O(13)-Yb(3)-O(12)   | 62.8(3)  |
| O(9)#2-Yb(1)-O(13)  | 151.4(3) | O(8)-Yb(3)-O(12)    | 81.5(3)  |
| O(10)#2-Yb(1)-O(13) | 128.9(3) | O(9)-Yb(3)-O(12)    | 98.2(3)  |
| O(12)-Yb(1)-O(13)   | 61.4(3)  | O(13)-Yb(3)-O(6)#5  | 73.3(3)  |
| O(10)-Yb(1)-O(1)    | 89.6(3)  | O(8)-Yb(3)-O(6)#5   | 140.3(3) |
| O(11)-Yb(1)-O(1)    | 79.6(3)  | O(9)-Yb(3)-O(6)#5   | 106.7(3) |
| O(11)#1-Yb(1)-O(1)  | 124.1(3) | O(12)-Yb(3)-O(6)#5  | 134.8(3) |
| O(9)#2-Yb(1)-O(1)   | 78.4(3)  | O(13)-Yb(3)-O(8)#6  | 142.8(3) |
| O(10)#2-Yb(1)-O(1)  | 134.2(3) | O(8)-Yb(3)-O(8)#6   | 71.0(3)  |
| O(12)-Yb(1)-O(1)    | 134.4(3) | O(9)-Yb(3)-O(8)#6   | 70.0(3)  |
| O(13)-Yb(1)-O(1)    | 73.4(3)  | O(12)-Yb(3)-O(8)#6  | 151.7(3) |
| O(7)#3-Yb(2)-O(13)  | 130.5(3) | O(6)#5-Yb(3)-O(8)#6 | 73.3(3)  |
| O(7)#3-Yb(2)-O(7)   | 70.9(3)  | O(13)-Yb(3)-O(7)    | 70.4(3)  |
| O(13)-Yb(2)-O(7)    | 71.8(3)  | O(8)-Yb(3)-O(7)     | 71.3(3)  |
| O(7)#3-Yb(2)-O(12)  | 79.8(3)  | O(9)-Yb(3)-O(7)     | 147.9(3) |
| O(13)-Yb(2)-O(12)   | 62.1(3)  | O(12)-Yb(3)-O(7)    | 77.4(3)  |
| O(7)-Yb(2)-O(12)    | 79.1(3)  | O(6)#5-Yb(3)-O(7)   | 98.0(3)  |
| O(7)#3-Yb(2)-O(4)   | 138.0(3) | O(8)#6-Yb(3)-O(7)   | 98.7(3)  |
| O(13)-Yb(2)-O(4)    | 74.1(3)  | O(13)-Yb(3)-O(10)   | 70.1(3)  |
| O(7)-Yb(2)-O(4)     | 92.4(3)  | O(8)-Yb(3)-O(10)    | 135.5(3) |
| O(12)-Yb(2)-O(4)    | 136.0(3) | O(9)-Yb(3)-O(10)    | 67.5(3)  |
| O(7)#3-Yb(2)-O(9)#4 | 76.2(3)  | O(12)-Yb(3)-O(10)   | 78.6(3)  |
| O(13)-Yb(2)-O(9)#4  | 137.5(3) | O(6)#5-Yb(3)-O(10)  | 77.1(3)  |
| O(7)-Yb(2)-O(9)#4   | 146.7(3) | O(8)#6-Yb(3)-O(10)  | 117.1(3) |
| O(12)-Yb(2)-O(9)#4  | 100.2(3) | O(7)-Yb(3)-O(10)    | 139.8(3) |

<sup>d</sup>Symmetry codes: (#1) -x-2,-y+2,-z+1; (#2) -x-3,-y+2,-z+1; (#3) -x-2,-y+1,-z+1; (#4) x+1,y,z; (#5) x-1,y,z; (#6) -x-3,-y+1,-z+1; (#7) -x-3,-y+2,-z+2; (#8) -x-2,-y+1,-z+2

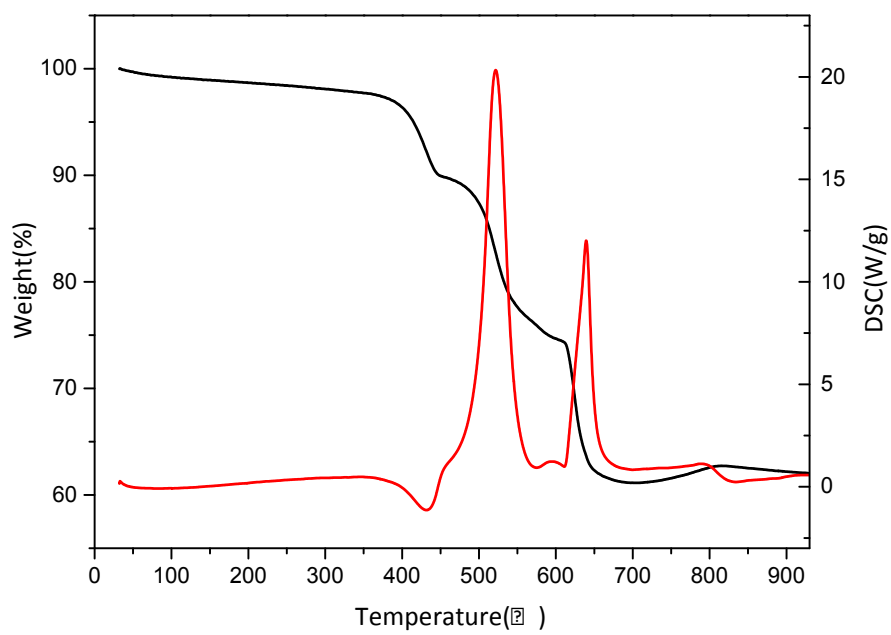

**Fig. S5** TGA-DSC curves of compound 1.

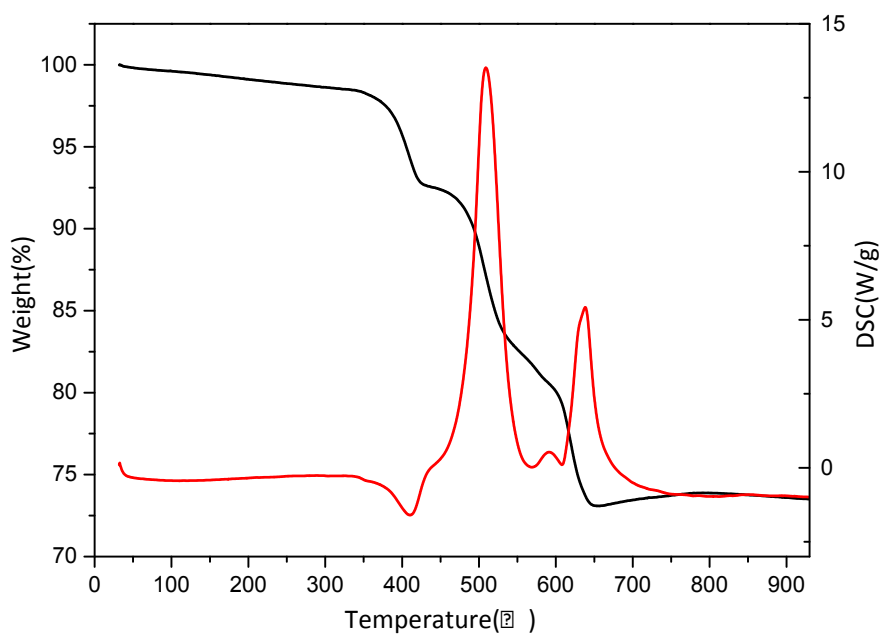

**Fig. S6** TGA-DSC curves of compound 2.

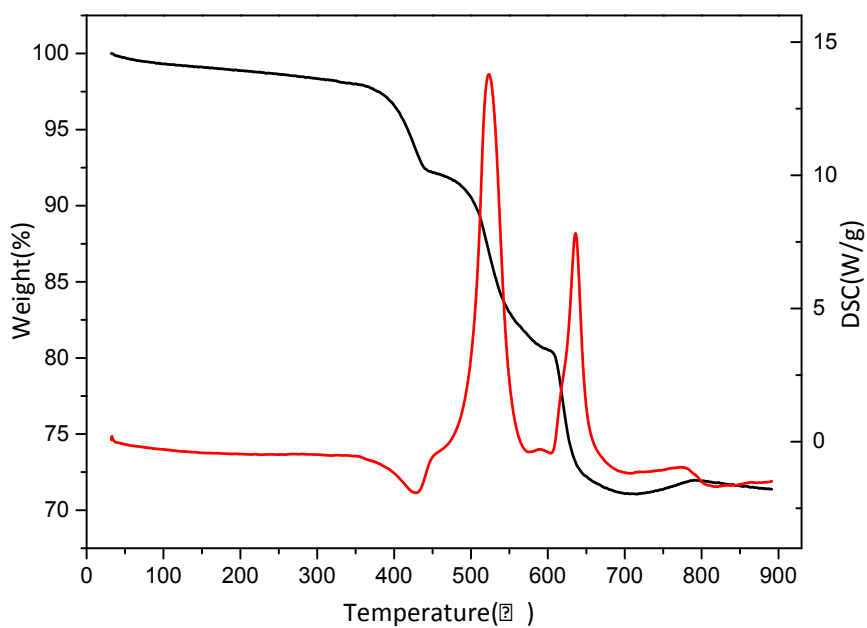

**Fig. S7** TGA-DSC curves of compound **3**.

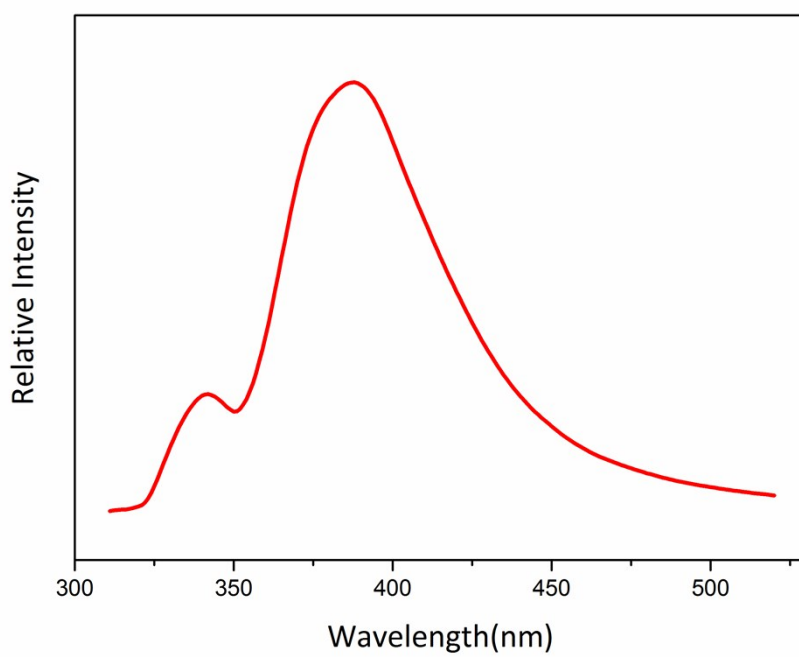

**Fig. S8** The emission spectra of 1,5-NDS ligand.

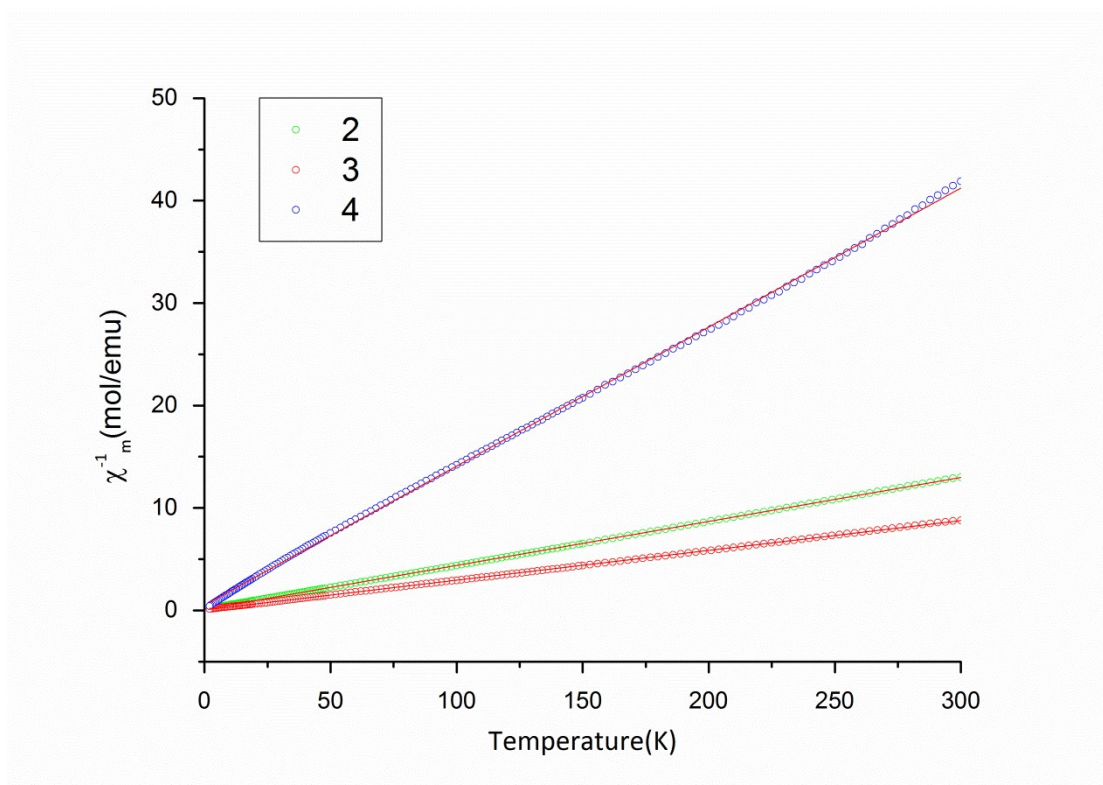

**Fig. S9** The Curie-Weiss fitting of the  $\chi_m^{-1}$ -T data for compounds **2-4**.
